# Supplementary material for: Trajectories of nitrate input and output in three nested catchments along a land use gradient
Source: Copernicus journal article supplement (doi:10.5194/hess-23-3503-2019), 2019-09-02
Supplement: Supplementary file 1 [file hess-23-3503-2019-supplement.pdf]

Supplement of Hydrol. Earth Syst. Sci., 23, 3503–3524, 2019  
<https://doi.org/10.5194/hess-23-3503-2019-supplement>  
© Author(s) 2019. This work is distributed under  
the Creative Commons Attribution 4.0 License.

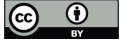

*Supplement of*

## **Trajectories of nitrate input and output in three nested catchments along a land use gradient**

**Sophie Ehrhardt et al.**

*Correspondence to:* Sophie Ehrhardt ([sophie.ehrhardt@ufz.de](mailto:sophie.ehrhardt@ufz.de))

The copyright of individual parts of the supplement might differ from the CC BY 4.0 License.

## Supplement

### S1 Addition to material and methods

#### S1.1 Catchment characteristics

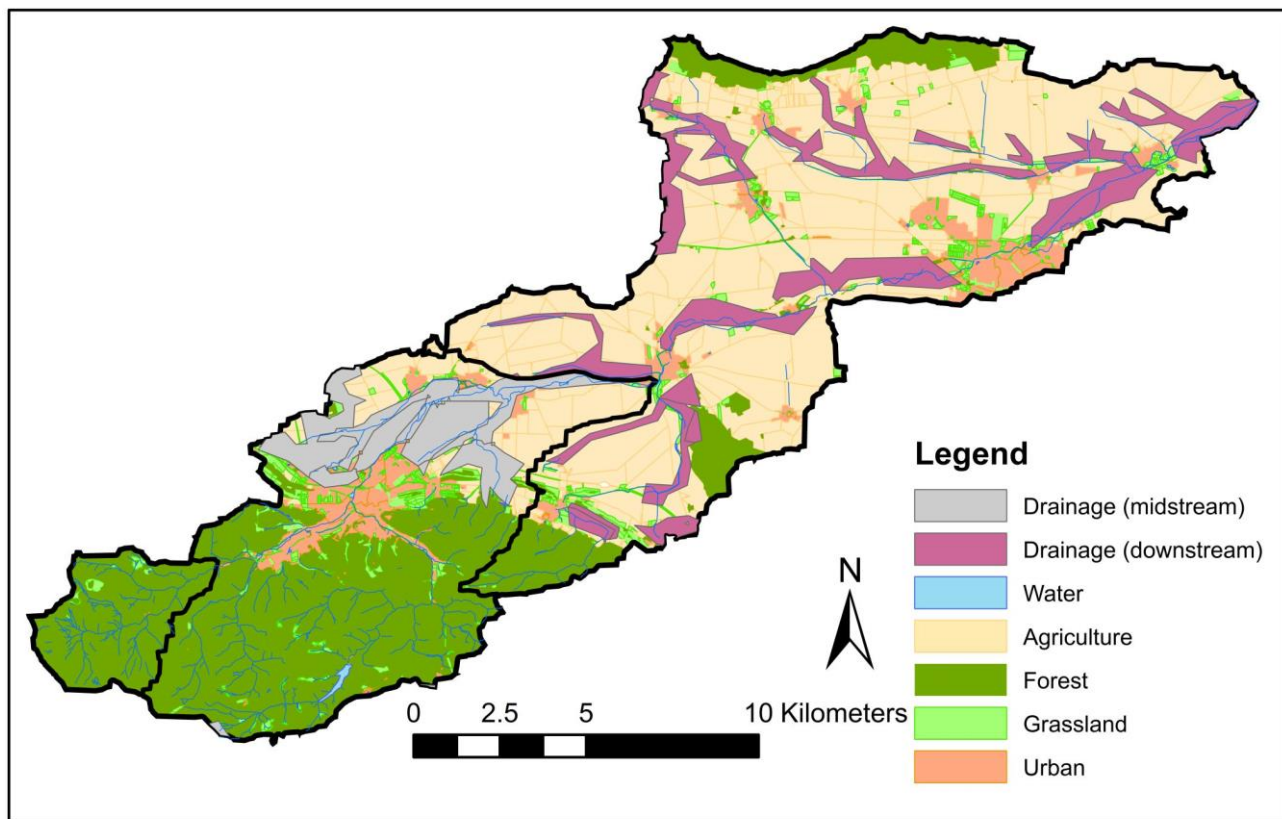

5 Figure S1.1: Map of the catchment highlighting the agricultural area that is artificially drained

## S1.2 Water quality time series of $\text{NH}_4\text{-N}$ and $\text{NO}_2\text{-N}$

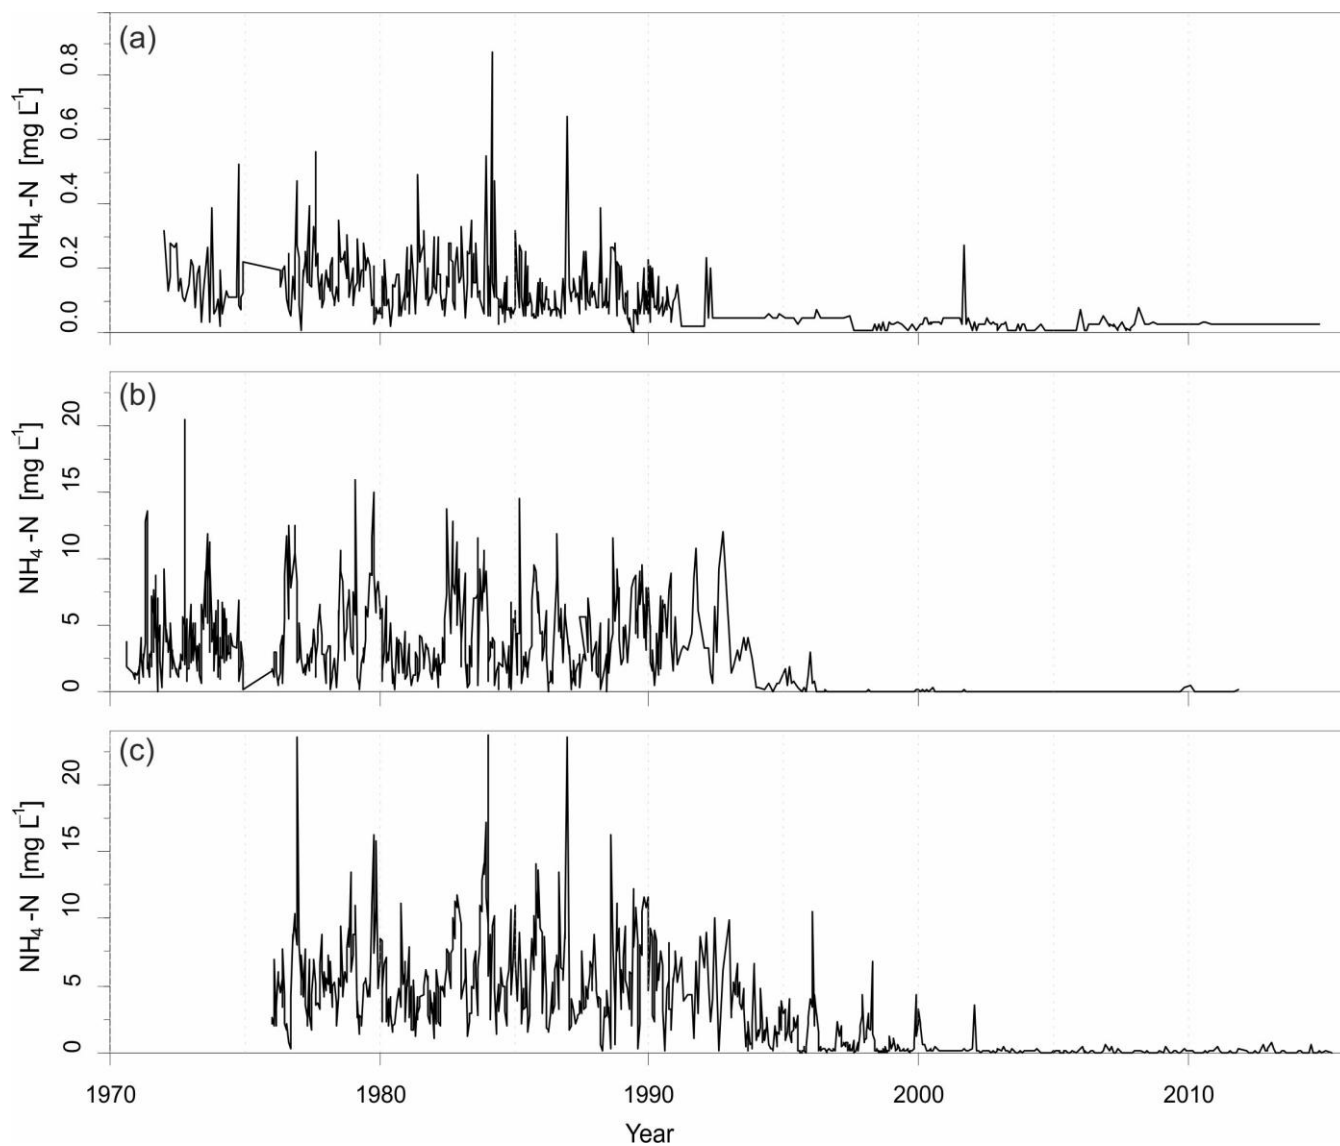

Figure S1.2.1: Time series of  $\text{NH}_4\text{-N}$  concentrations. (a) Upstream; (b) Midstream; (c) Downstream.

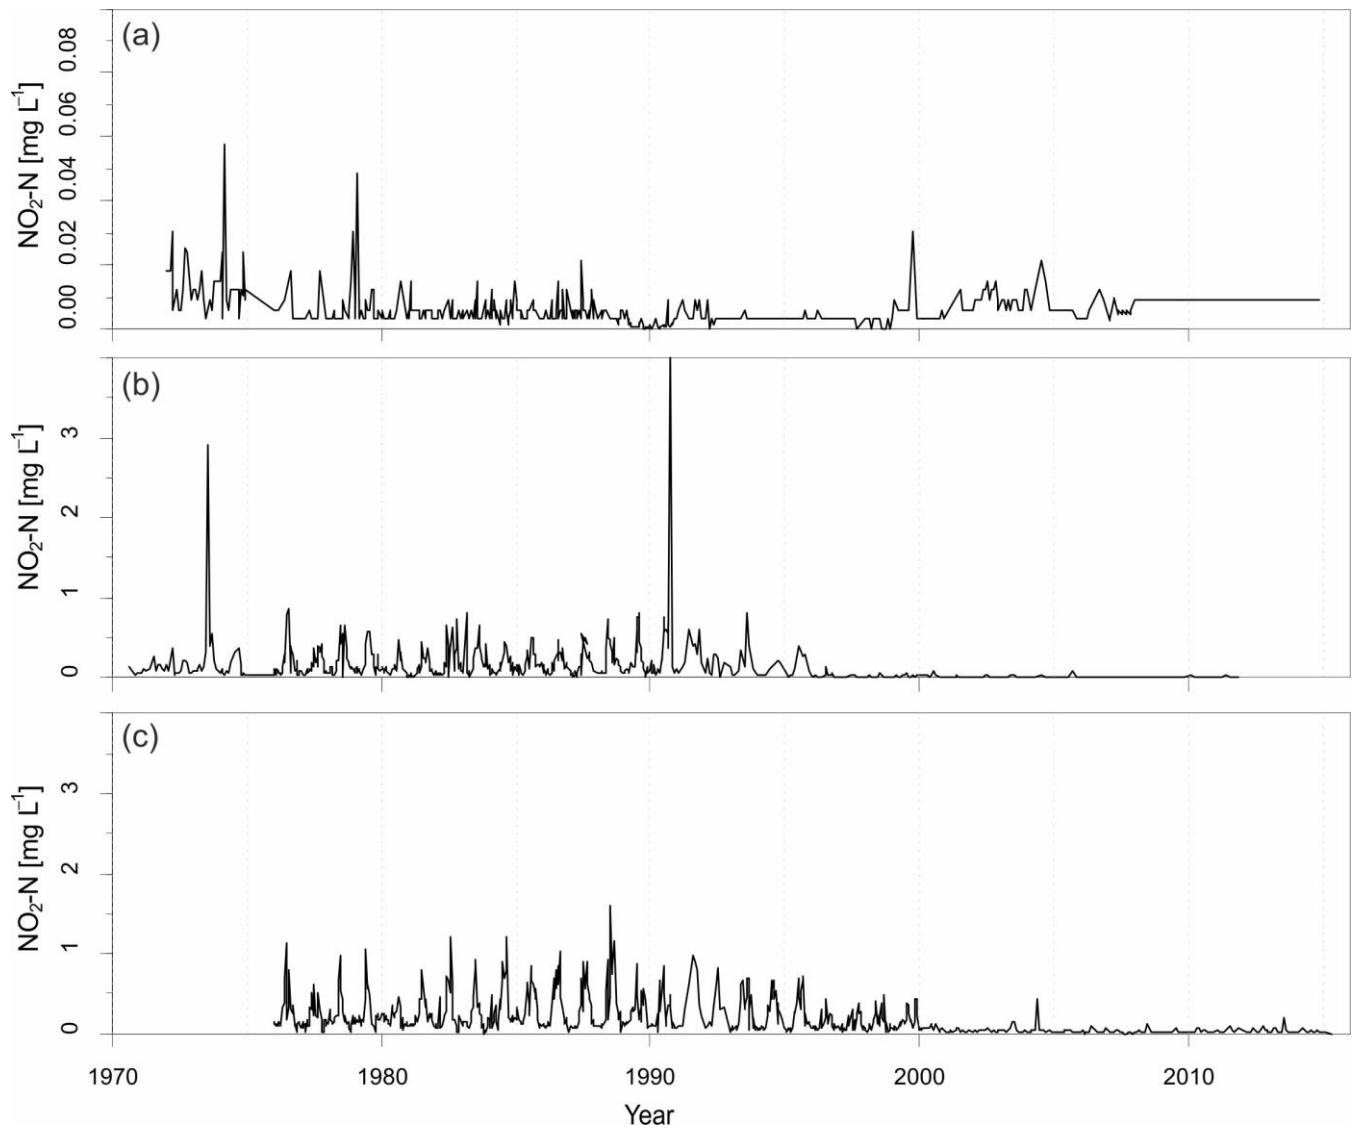

**Figure S1.2.2: Time series of NO<sub>2</sub>-N concentrations. (a) Upstream; (b) Midstream; (c) Downstream.**

5

10

### S.1.2.3 Estimation of NO<sub>3</sub>-N contribution from wastewater borne NH<sub>4</sub>-N

The assumption that agricultural, diffuse input was the main source of NO<sub>3</sub>-N, needed an investigation of the possible amount of NO<sub>3</sub>-N stemming from nitrified NH<sub>4</sub>-N released by the WWTPs.

We estimated the maximal amount of waste water born NO<sub>3</sub>-N from the highest nitrification rates taken from other studies (Webster et al., 2003; Mulholland et al., 2000, Tank et al., 2000). The highest rate was 0.19 g m<sup>-2</sup> d<sup>-1</sup> (Tank et al., 2000). Note that we assume that this rate is constant over the year and that NH<sub>4</sub>-N was always unlimitedly available.

To calculate the river area, we used the stream length und mean stream width between the two WWTPs and corresponding stations Mid- and Downstream (Table S.1.2.3). This estimation took the relocation of the WWTP Wernigerode in 1995 into account. The estimation of waste water born NO<sub>3</sub>-N revealed a maximal contribution of 5.2 % stemming from nitrification over the years. Hence, in-stream nitrification of NH<sub>4</sub>-N release from point sources did not contributed significantly to riverine NO<sub>3</sub> loads or concentrations.

**Table S.1.2.3: Estimation of NO<sub>3</sub>-N contribution by in-stream nitrification of waste water born NH<sub>4</sub>-N in the anthropogenically impacted subcatchments**

|                                                                                  | Midstream<br>before 1995 | Midstream<br>after 1995 | Downstream |
|----------------------------------------------------------------------------------|--------------------------|-------------------------|------------|
| NH <sub>4</sub> -N uptake (Tank et al. 2000; g m <sup>-2</sup> d <sup>-1</sup> ) | 0.19                     |                         |            |
| River area from WWTP to station (m <sup>2</sup> )                                | 58456                    | 12431                   | 46092      |
| Nitrified NH <sub>4</sub> -N (t a <sup>-1</sup> )                                | 4.1                      | 0.9                     | 3.2        |
| Years of selected time series                                                    | 1972–1995                | 1995–2011               | 1976–2011  |
| Total uptake over time (t N)                                                     |                          | 107.0                   | 111.9      |
| Total NO <sub>3</sub> -N export over time (t)                                    |                          | 3697                    | 2146       |
| Total uptake according to export (%)                                             |                          | 2.9                     | 5.2        |

15

20

## S2 Addition to results

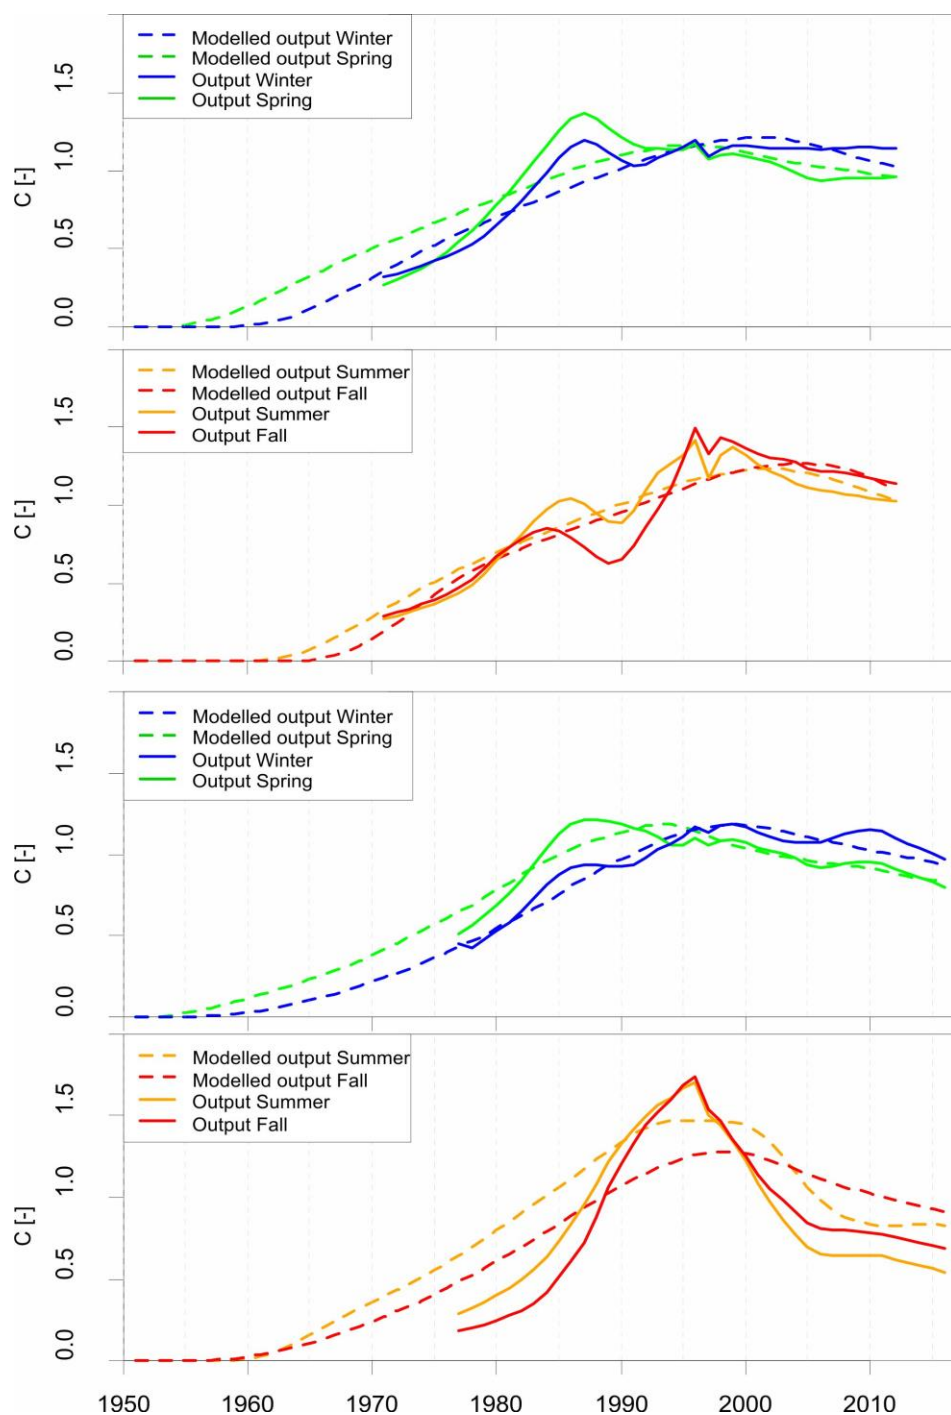

Figure S2.1: Modelled N-output concentrations derived from the N-input convolved with the log-normal travel time distributions (dashed lines) and the scaled observed flow-normalized seasonal  $\text{NO}_3\text{-N}$  concentrations (solid lines) over time.

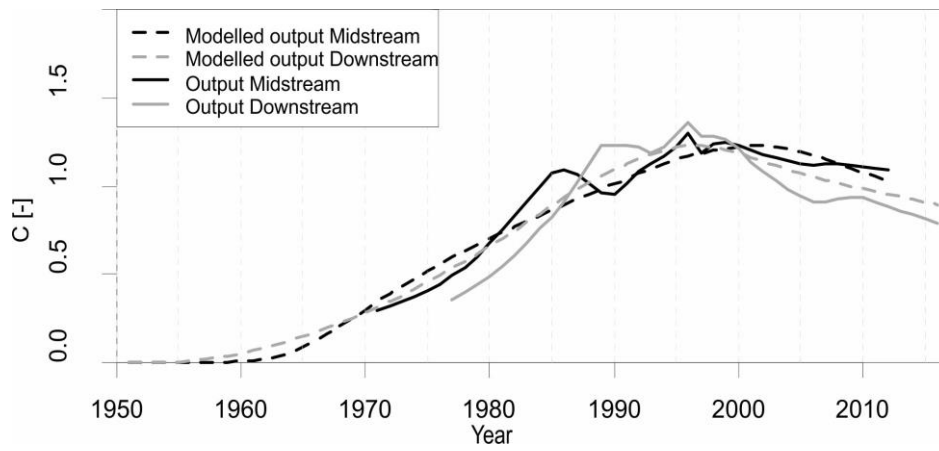

**Figure S2.2: Modelled N-output concentrations derived from the N-input convolved with the log-normal travel time distributions (dashed lines) and the scaled observed flow-normalized annual  $\text{NO}_3\text{-N}$  concentrations (solid lines) over time.**
